# Supplementary material for: Performance study of magnesium–sulfur battery using a graphene based sulfur composite cathode electrode and a non-nucleophilic Mg electrolyte
Source: Royal Society of Chemistry journal article supplement (doi:10.1039/c5nr04383b), 2015-10-28
Supplement: c5nr04383b1.pdf [file c5nr04383b1.pdf]

## Supporting Information

### **Performance study of magnesium-sulfur battery using graphene based sulfur composite as cathode electrode and a non-nucleophilic Mg electrolyte**

*B. P. Vinayan <sup>\*a</sup>, Zhirong Zhao-Karger <sup>b</sup>, Thomas Diemant <sup>c</sup>, Venkata Sai Kiran Chakravadhanula <sup>a,b,d</sup>, Nele I. Schwarzburger <sup>a</sup>, Musa Ali Cambaz <sup>a</sup>, R. Jürgen Behm <sup>a,c</sup>, Christian Kübel <sup>a,b,d</sup>, Maximilian Fichtner <sup>\*a,b</sup>*

<sup>a</sup>Helmholtz Institute Ulm for Electrochemical Energy Storage (HIU), Helmholtzstr. 11,  
D-89081 Ulm, Germany

<sup>b</sup>Institute of Nanotechnology, Karlsruhe Institute of Technology (KIT),  
P.O. Box 3640, D-76021 Karlsruhe

<sup>c</sup> Institute of Surface Chemistry and Catalysis, Ulm University, Albert-Einstein-Allee 47, D-  
89081 Ulm, Germany

<sup>d</sup> Karlsruhe Nano Micro Facility, Karlsruhe Institute of Technology, D-76344 Eggenstein-  
Leopoldshafen, Germany

Phone: +49 (0)731 50 34201, Fax: +49 (0)731 50 34299,

[maximilian.fichtner@kit.edu](mailto:maximilian.fichtner@kit.edu) , [vinayan.parambath@kit.edu](mailto:vinayan.parambath@kit.edu)

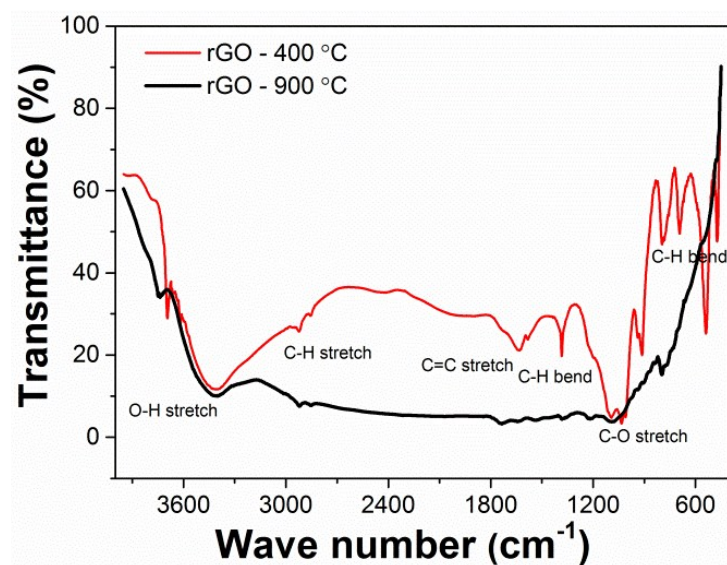

Fig.S1: FTIR spectra of rGO exfoliated at 400 °C and further heated to 900 °C under vacuum for 1 h.

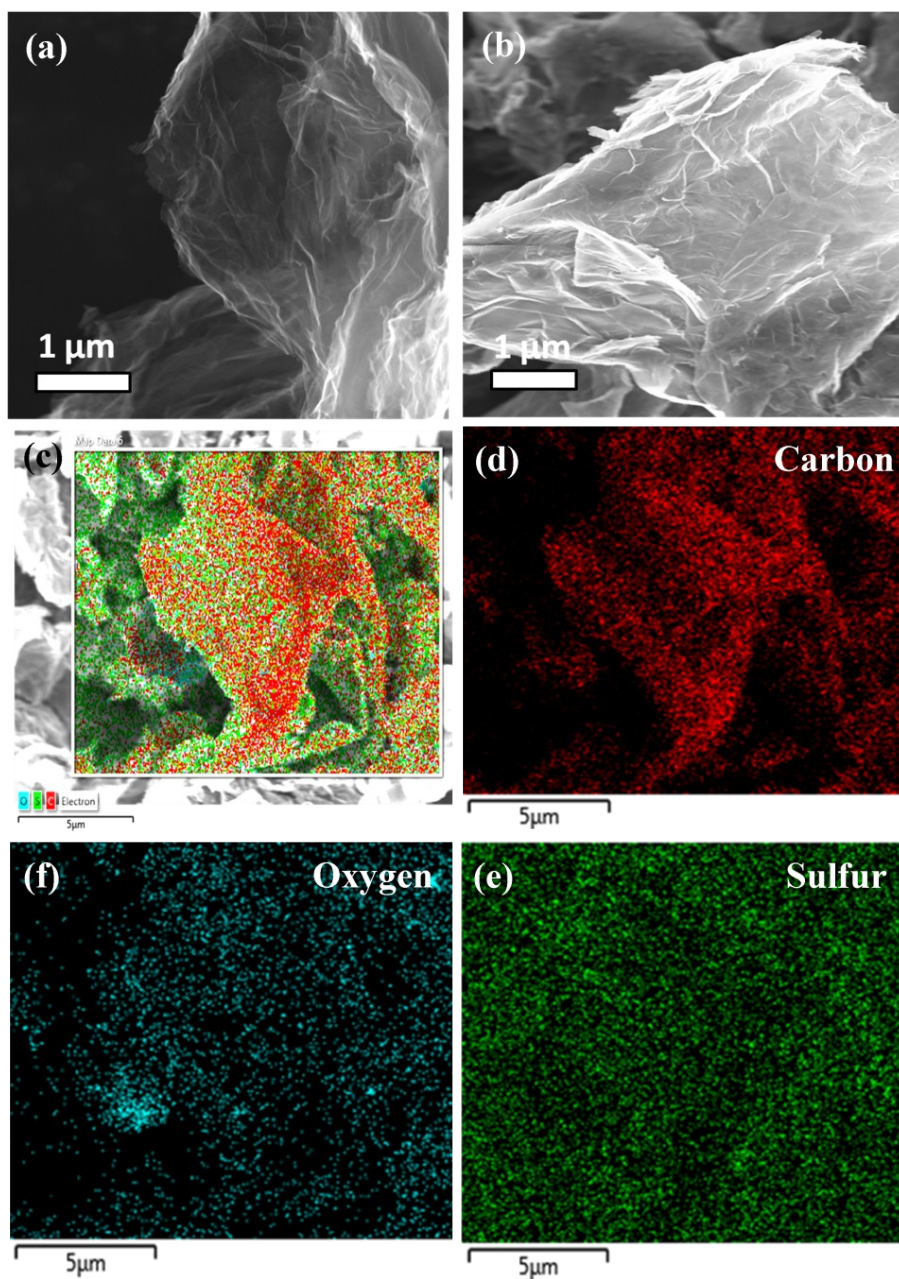

Fig. S2: Scanning electron micrographs of *rGO* (a), and *S-rGO* (b) nanocomposite. Elemental distribution within the samples was studied by energy dispersive X-ray spectroscopy (EDS), using SEM equipped with Silicon Drift Detector (OXFORD Instruments). Elemental mapping of *S-rGO* nanocomposite (c-f) illustrating the uniform distribution of C, O and S.

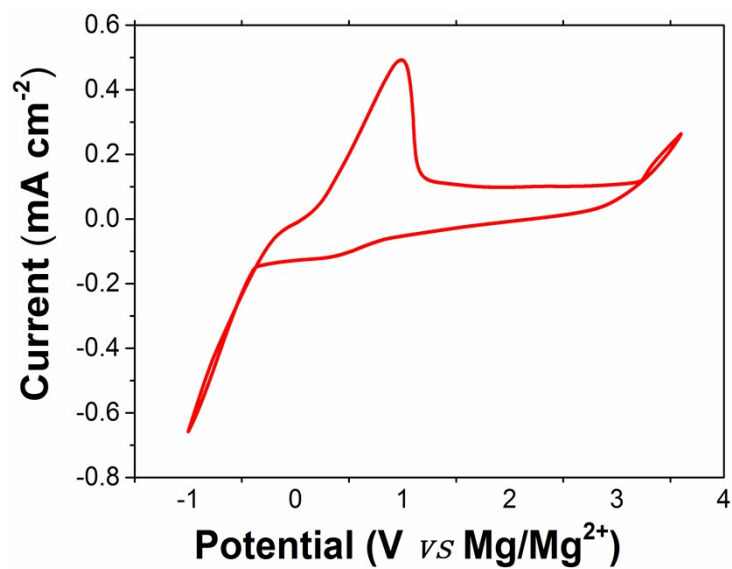

Fig.S3: Cyclic voltammetry of the non-nucleophilic Mg electrolyte using Inconel disc as the working electrode and a Mg foil as reference/counter electrode at a scan rate of 25 mV s<sup>-1</sup>. The measurements were carried out with a two-electrode cell using Biologic VMP-3 potentiostat.

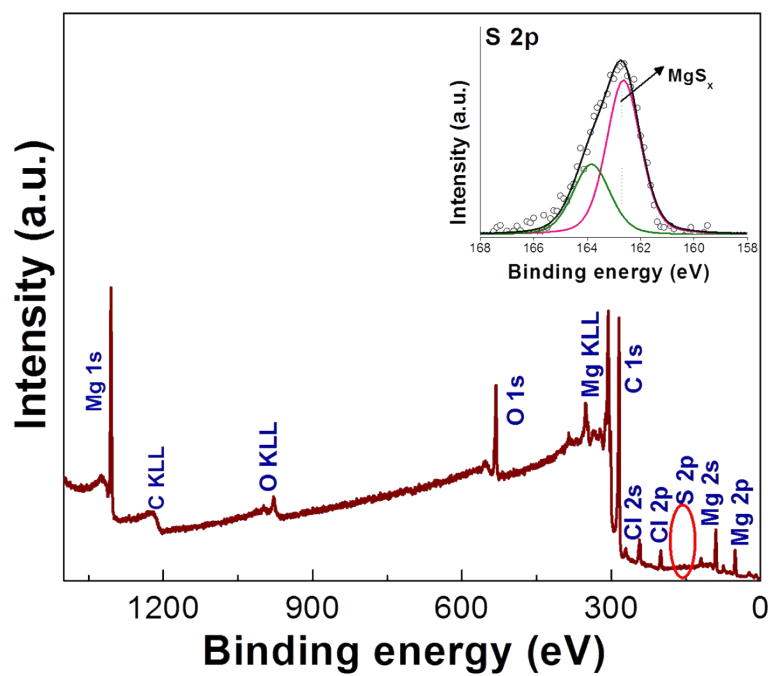

Fig. S4: XPS survey spectrum of a Mg/C anode after 50 battery cycles. Inset shows a high resolution S2p XP spectrum.

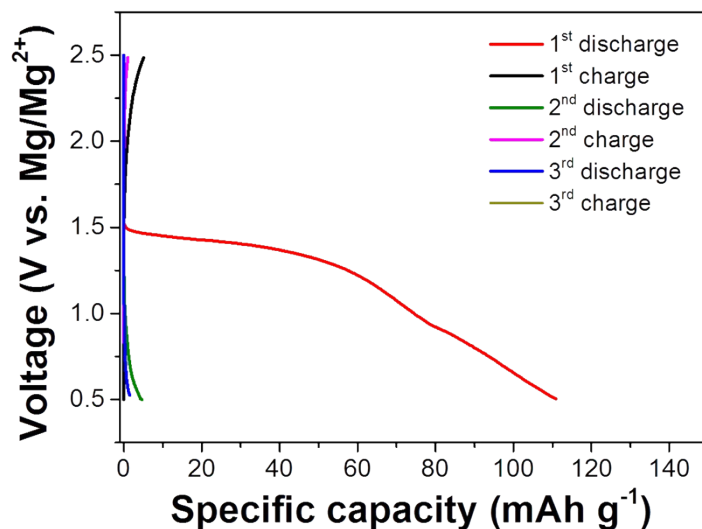

Fig.S5: Electrochemical battery performance of a sulfur cathode without rGO in Mg/S battery at the current density of 20 mA $g^{-1}$ .

The cathode electrodes were made by mechanical mixing of 75 wt. % of sublimed sulfur (99.5 %, Alfa Aesar), 10 wt. % polyvinylidene fluoride (PVDF, Kynar) binder and 15 wt. % Super P carbon, using N-methyl-2-pyrrolidinone (NMP, Sigma-Aldrich) solvent. The slurry was uniformly coated over an Inconel 625 current collector disk (10 mm diameter) and dried at 60 °C for 24 h to remove the solvent. A Swagelok type cell was used with Mg-carbon composite pellets (10 mm) as anode electrode, Celgard 2500 as the separator, and a non-nucleophilic Mg electrolyte. The sulfur loading within the cathode electrode (1.5 mg  $cm^{-2}$ ) and the amount of electrolyte (80  $\mu$ L) were restricted to the same amount used in the previous cell with S-rGO as cathode electrode.

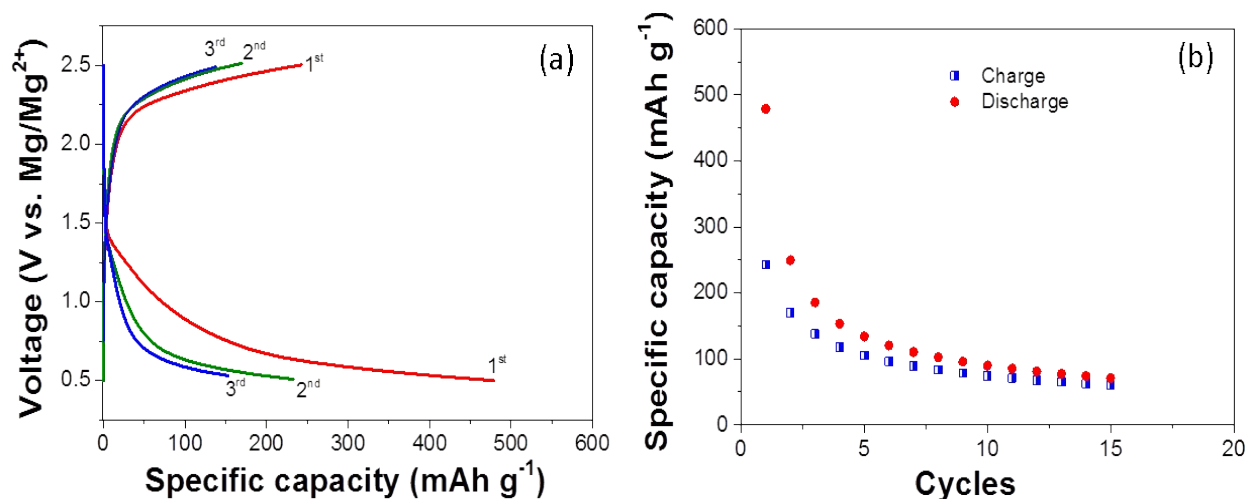

Fig.S6: Electrochemical Mg/S battery performance of a (Sulfur/high temperature treated rGO) composite cathode electrode at a current density of 20 mA g<sup>-1</sup>. (a) Initial cycles, (b) Cyclic stability.

To understand the influence of the oxygen functional groups over rGO towards electrochemical Mg/S battery performance, we have carried out the following procedure. The rGO was heated to a high temperature of 900 °C under vacuum atmosphere for 1 hr to remove the oxygen functional groups. This sample was labelled as rGO (900 °C). The removal of oxygen functional groups from the sample were verified by FTIR (Fig. S1). Sulfur/rGO (900 °C) composite was prepared by mechanical mixing using a ball mill (200 rpm, 4hr). The sulfur loading within the composite was the same as that of S-rGO (52 wt. %). The cathode electrodes were made by mixing of 75 wt. % of sulfur/rGO (900 °C), 10 wt. % polyvinylidene fluoride (PVDF, Kynar) binder and 15 wt. % Super P carbon, using N-methyl-2-pyrrolidinone (NMP, Sigma-Aldrich) solvent. The slurry was uniformly coated over an Inconel 625 current collector disk (10 mm diameter) and dried at 60 °C for 24 h to remove the solvent. A Swagelok type cell was used with Mg-carbon composite pellets (10 mm) as anode electrode, Celgard 2500 as the separator, and a non-nucleophilic Mg

electrolyte. The sulfur loading within the cathode electrode ( $1.5 \text{ mg cm}^{-2}$ ) and the amount of electrolyte ( $80 \text{ }\mu\text{L}$ ) was the same like that of the cell using S-rGO as cathode electrode.
